# Supplementary material for: Amine-functionalized MIL-53(Al) with embedded ruthenium nanoparticles as a highly efficient catalyst for the hydrolytic dehydrogenation of ammonia borane
Source: Royal Society of Chemistry journal article supplement (doi:10.1039/c8ra01507d), 2018-01-01
Supplement: c8ra01507d1.pdf [file c8ra01507d1.pdf]

## **Supplementary information (ESI) for RSC Advances.**

### **Amine-functionalized MIL-53(Al) with embedded ruthenium nanoparticles as a highly efficient catalyst for the hydrolytic dehydrogenation of ammonia borane**

Shuren Zhang, Liqun Zhou\* and Menghuan Chen

Hubei Collaborative Innovation Center for Advanced Organic Chemical Materials,  
Ministry of Education Key Laboratory for the Synthesis and Application of Organic  
Functional Molecules, College of Chemistry and Chemical Engineering, Hubei  
University, Wuhan 430062, PR China

Corresponding author. Tel.: +86 27 88662747; fax: +86 27 88663043.

E-mail addresses: zhangsr351@163.com (S. Zhang), zhoulq2003@163.com (L.Zhou).

## Supplementary (S1):

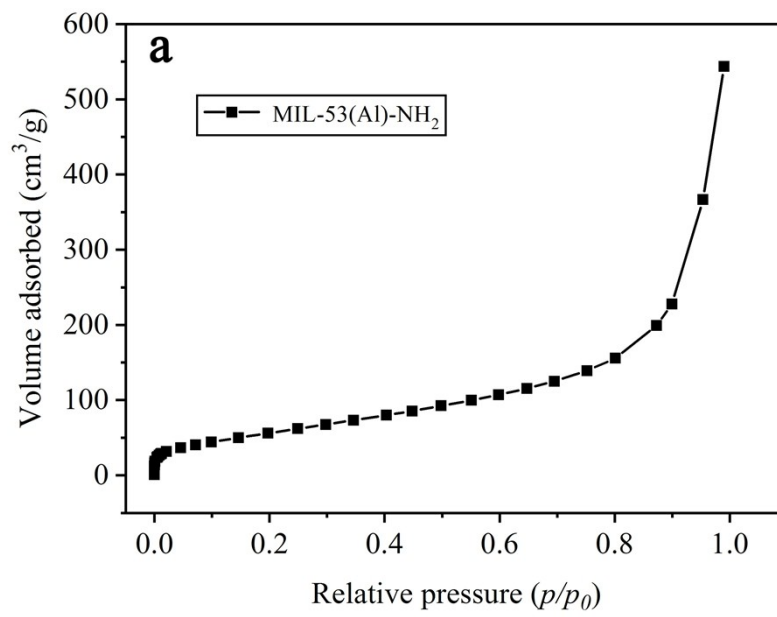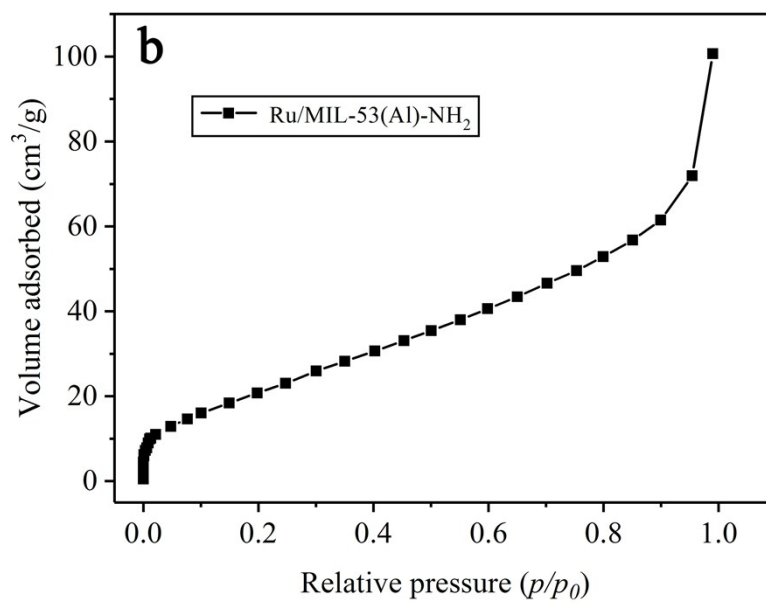

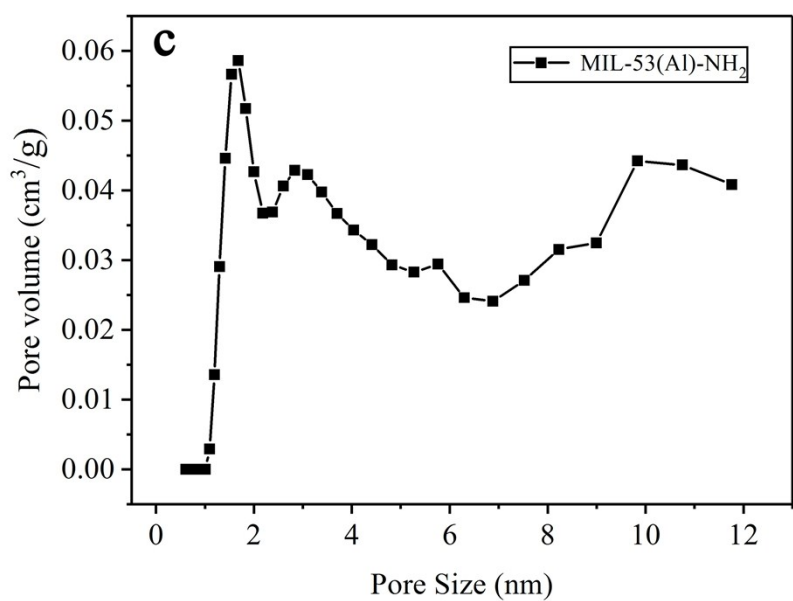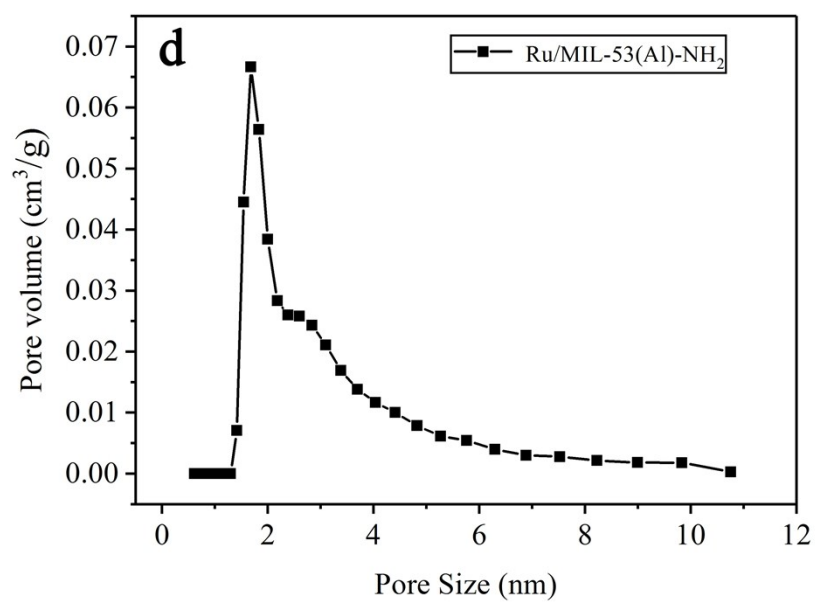

**Fig. S1** N<sub>2</sub> sorption isotherms of (a) MIL-53(Al)-NH<sub>2</sub> and (b) Ru/MIL-53(Al)-NH<sub>2</sub>; pore size distributions of (c) MIL-53(Al)-NH<sub>2</sub> and (d) Ru/MIL-53(Al)-NH<sub>2</sub>.

## Supplementary (S2):

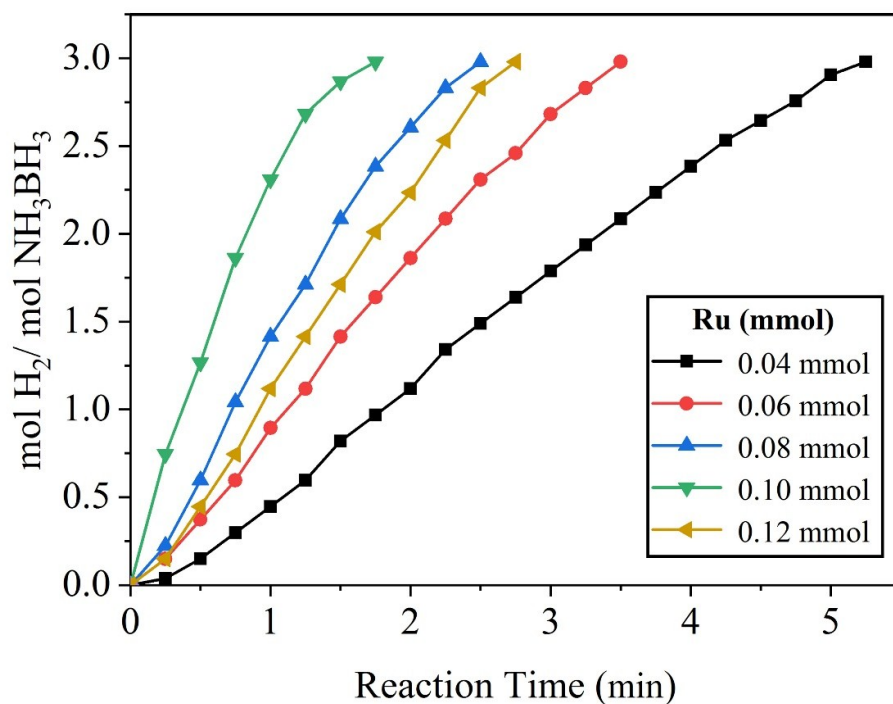

**Fig. S2** mol H<sub>2</sub>/ mol H<sub>3</sub>NBH<sub>3</sub> versus time graph for different initial Ru additions in Ru/MIL-53(Al)-NH<sub>2</sub> used for the hydrolysis of AB (18.5 mg) at 25 °C.

**Supplementary (S3):**

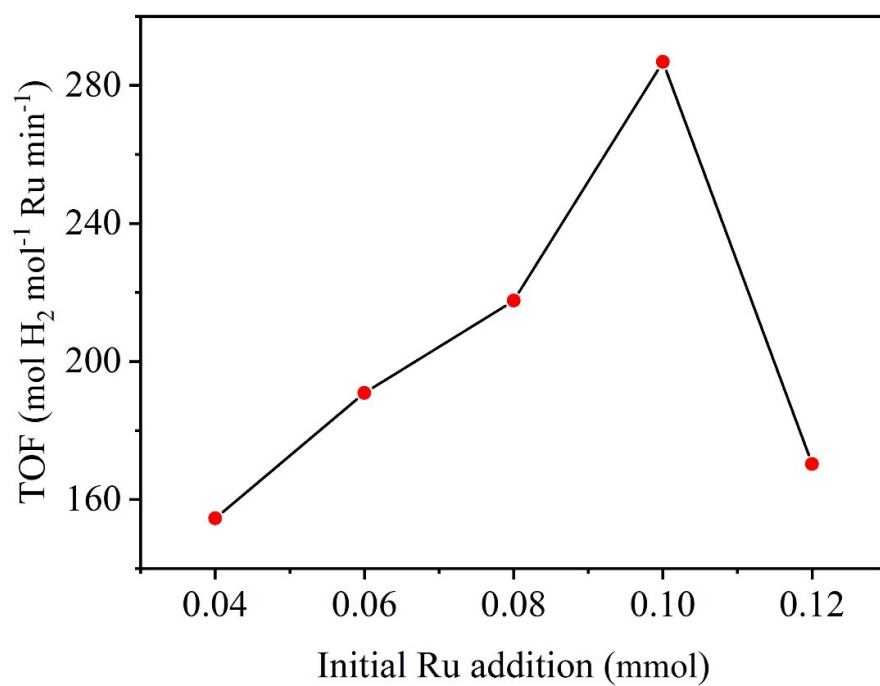

**Fig. S3** The TOF values (mol H<sub>2</sub> min<sup>-1</sup> mol<sup>-1</sup> Ru<sup>-1</sup>) versus initial Ru addition for the hydrolysis of AB (18.5 mg) at 25 °C.
